# Supplementary material for: Defective metabolic programming impairs early neuronal morphogenesis in neural cultures and an organoid model of Leigh syndrome
Source: PubMed Central journal article supplement (PMC7997884; doi:10.1038/s41467-021-22117-z), 2021-03-26
Supplement: 41467_2021_22117_MOESM1_ESM.pdf [file 41467_2021_22117_MOESM1_ESM.pdf]

## SUPPLEMENTARY INFORMATION

### **Defective metabolic programming impairs early neuronal morphogenesis in neural cultures and an organoid model of Leigh syndrome**

Inak et al.

Manuscript correspondence:

Alessandro Prigione, [alessandro.prigione@hhu.de](mailto:alessandro.prigione@hhu.de)

**a**

**Patient S1**  
c.530T>G  
(p.V177G)

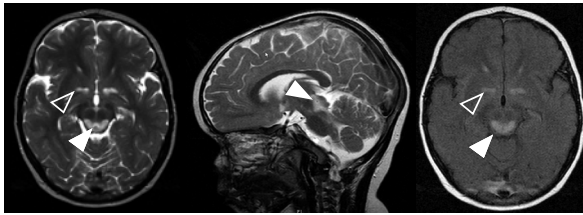

**b**

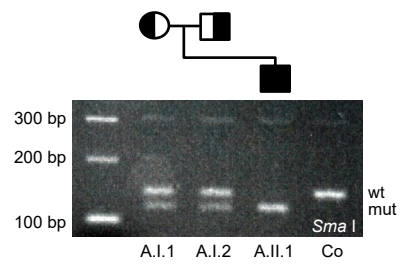

**c**

**Patient S2**  
c.769G>A  
(p.G257R)

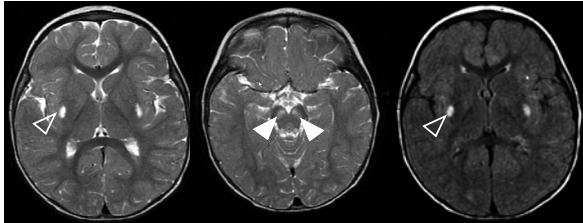

**d**

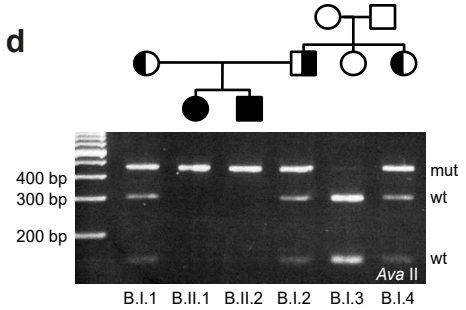

**e**

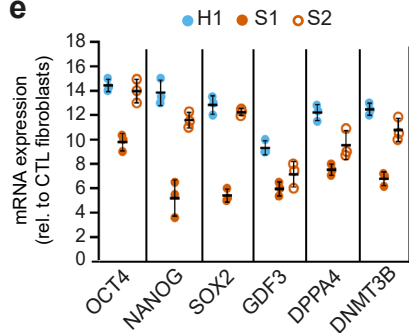

**f**

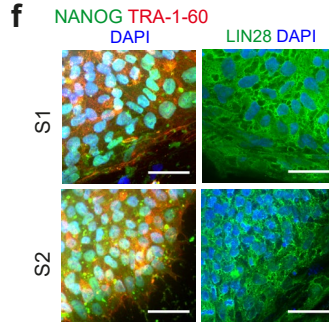

**g**

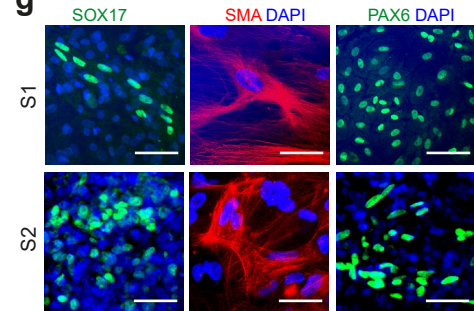

**h**

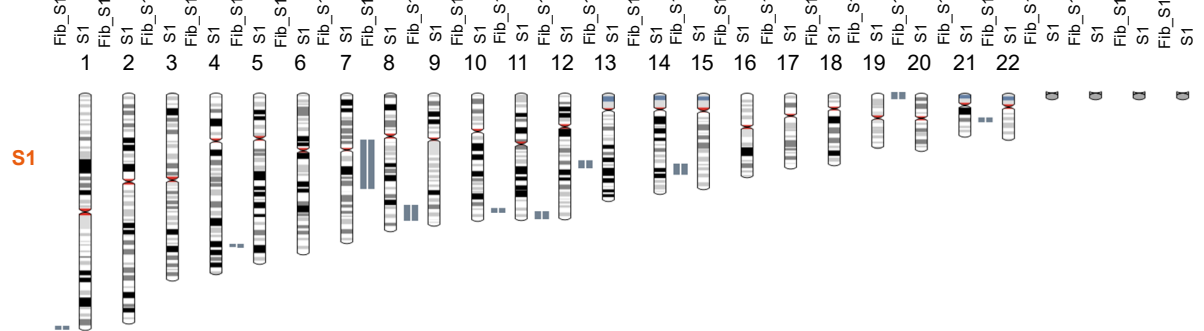

**i**

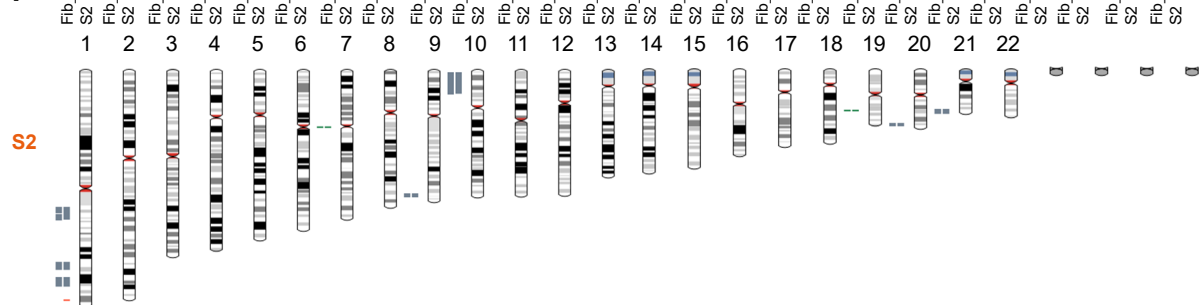

**Supplementary Fig. 1: Generation of SURF1 iPSCs (related to Fig. 1).**

**a** Cranial magnetic resonance imaging (MRI) of patient S1 at 2.3 years of age. Open arrowheads depict T2-signal intense lesions in the basal ganglia as the pathological hallmark of LS. White arrowheads point at brainstem lesions compromising the *formatio reticularis*. The lesions of the basal ganglia are further accentuated in the FLAIR sequences (right). **b** Pedigree of patient 1 (S1) family showing the segregation of the LS phenotype with homozygosity for the c.530T>G mutation in the S1 family (A.II.1). We assessed the mutation via PIRA using the restriction enzyme *SmaI* (n=3 independent experiments). **c** Cranial MRI of patient 2 (S2) at 1.7 years of age. Open arrowheads depict T2-signal intense lesions in the basal ganglia. White arrowheads point at lesions in the *substantia nigra*. The lesions are further accentuated in the FLAIR sequences (right). **d** Pedigree of S2 family showing the segregation between the LS phenotype with homozygosity for the c.769G>A mutation in the family of S2 sibling (B.II.1) and S2 patient (B.II.2). We assessed the mutation via PIRA using the restriction enzyme *AvaII* (n=3 independent experiments). **e** QRT-PCR of pluripotency markers in hESCs (H1) and SURF1 iPSCs (SURF1\_Mut: S1, S2) relative to control fibroblasts (C1) (normalized to *ACTB*; mean +/- s.d.; n=3 independent experiments). **f** Immunostainings showing pluripotency-associated protein markers NANOG, TRA-1-60, and LIN28 in SURF1 iPSCs (SURF1\_Mut: S1, S2) (n=2 independent experiments). Scale bar: 50  $\mu$ m. **g** Embryoid body (EB)-based *in vitro* differentiation of SURF1 iPSCs (SURF1\_Mut: S1, S2). Three germ layers represented by SOX17 for endoderm, smooth muscle actin (SMA) for mesoderm, and PAX6 for ectoderm. We counterstained nuclei using Hoechst (n=2 independent experiments). Scale bar: 50  $\mu$ m. **h-i** Karyotype analysis of SURF1 iPSCs (SURF1\_Mut: S1, S2) compared to the original parental fibroblasts (Fib\_S1 and Fib\_S2).

# Supp. Figure 2

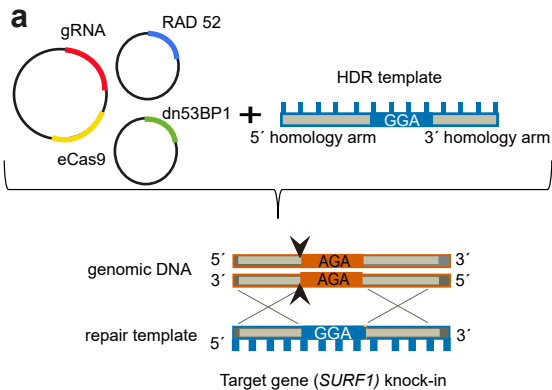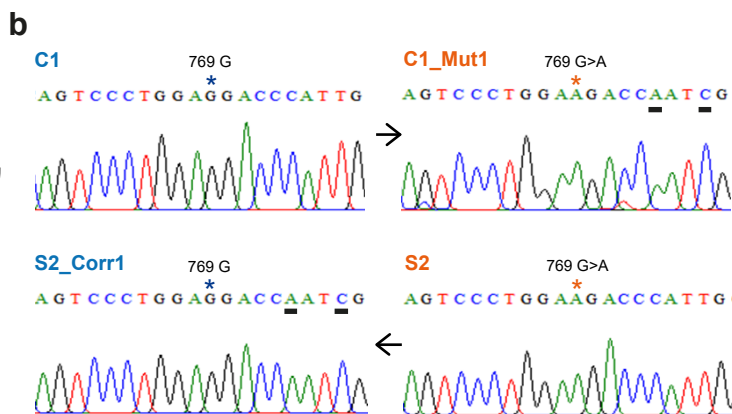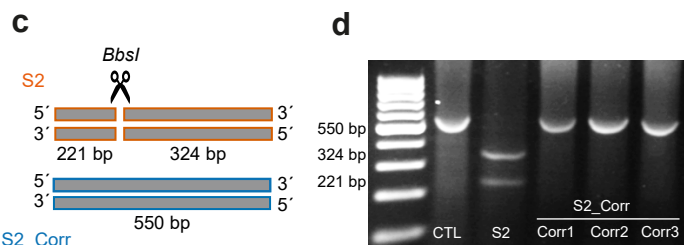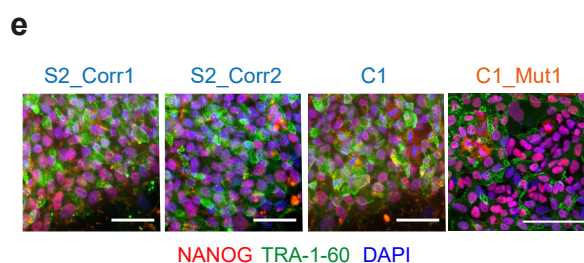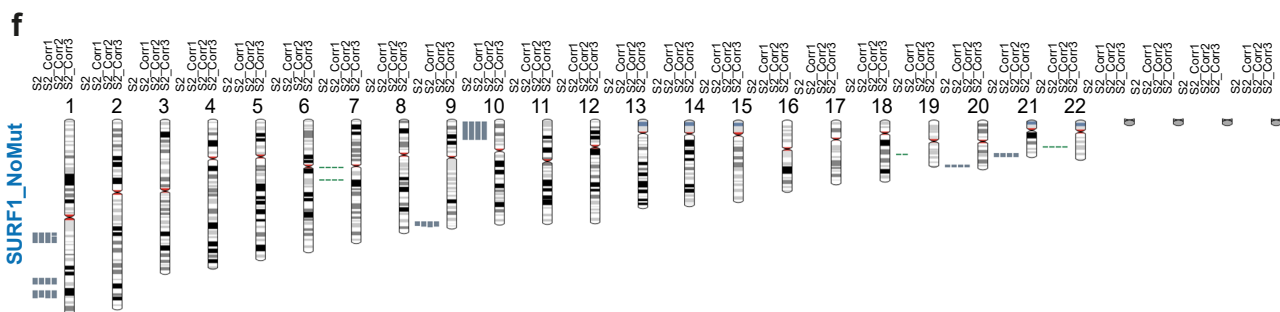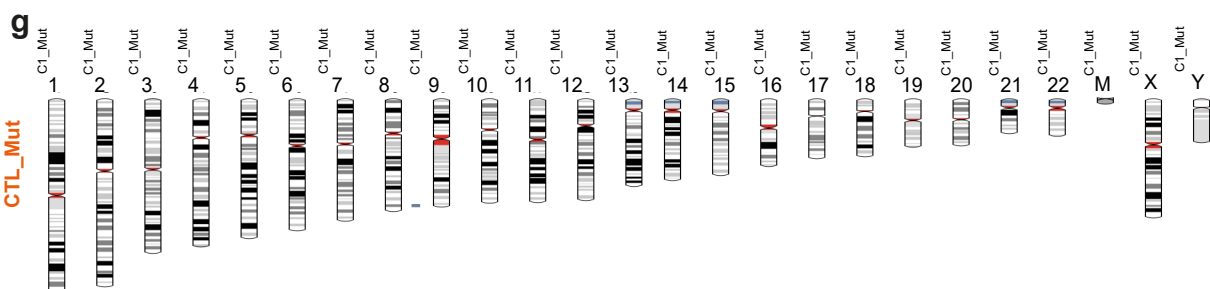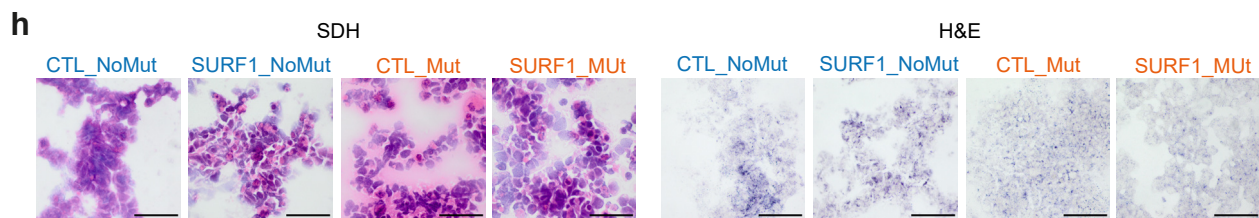

**Supplementary Fig. 2: Genome engineering of SURF1 iPSCs and CTL iPSCs (related to Fig. 1).**

**a** CRISPR/eCas9 knock-in strategy for *SURF1* mutation c.769G>A. Homologous direct repair (HDR) template (in blue) targeting the *SURF1* genomic region around 769G>A (in orange), with plasmids (i) pU6(BbsI)-CAG-eCas9-venus-bpA, 10,146 bp vector coding for a specific designed gRNA (red) and for the endonuclease Cas9 (yellow), (ii) 614.pCAG-hRad52-EF1BFP, 8,207 bp plasmid coding for RAD 52 (blue), (iii) 602.pCAG-i53-EF1BFP, 7,175 bp vector coding for dn53BP1 (green). **b** Electropherograms showing a portion of the *SURF1* sequence for CTL (CTL\_NoMut: C1), CTL\_Mut (C1\_Mut1), SURF1\_Mut (S2), and SURF1\_NoMut (S2\_Corr1). Blue stars: wild-type base pair; orange stars: mutant base pair; black underlines: artificially introduced silent mutations. **c-d** Visualization of successful knock-in events by cutting PCR products (550 bp long in healthy conditions) using restriction enzyme *BbsI*. In the presence of mutation c.769 G>A, the enzyme generated two fragments (221 bp + 324 bp). SURF1\_NoMut clones S2\_Corr1, S2\_Corr2 and S2\_Corr3 showed only one band of the same sizes as CTL\_NoMut (C1) (n=3 independent experiments). **e** Pluripotency markers expression in genome-edited iPSC lines: SURF1\_NoMut (S2\_Corr1, S2\_Corr2) engineered from SURF1\_Mut (line S2), and CTL\_Mut (C1\_Mut1) engineered from control CTL\_NoMut (line C1) (n=3 independent experiments). Nuclei were counterstained with Hoechst. Scale bar: 50  $\mu$ m. **f** Karyotype analysis of isogenic control lines SURF1\_NoMut (S2\_Corr1, S2\_Corr2, S2-Corr3) derived from SURF1 iPSC line S2 (n=2 independent experiments). **g** Karyotype analysis of isogenic mutant CTL\_Mut (C1\_Mut1) derived from CTL iPSC line C1 (n=2 independent experiments). **h** Mitochondrial enzyme activity for RC complex II succinate dehydrogenase (SDH) in CTL NPCs (CTL\_NoMut: C1; SURF1\_NoMut: S2\_Corr1) and SURF1 NPCs (SURF1\_Mut: S2; CTL\_Mut: C1\_Mut1). Reproduced in CTL NPCs (CTL\_NoMut: C2, C3; SURF1\_NoMut: S2\_Corr2) and SURF1 NPCs (SURF1\_Mut: S1) (n=3 independent experiments). We used haematoxylin and eosin (H&E) as a control staining. Scale bar: 500 nm.

# Supp. Figure 3

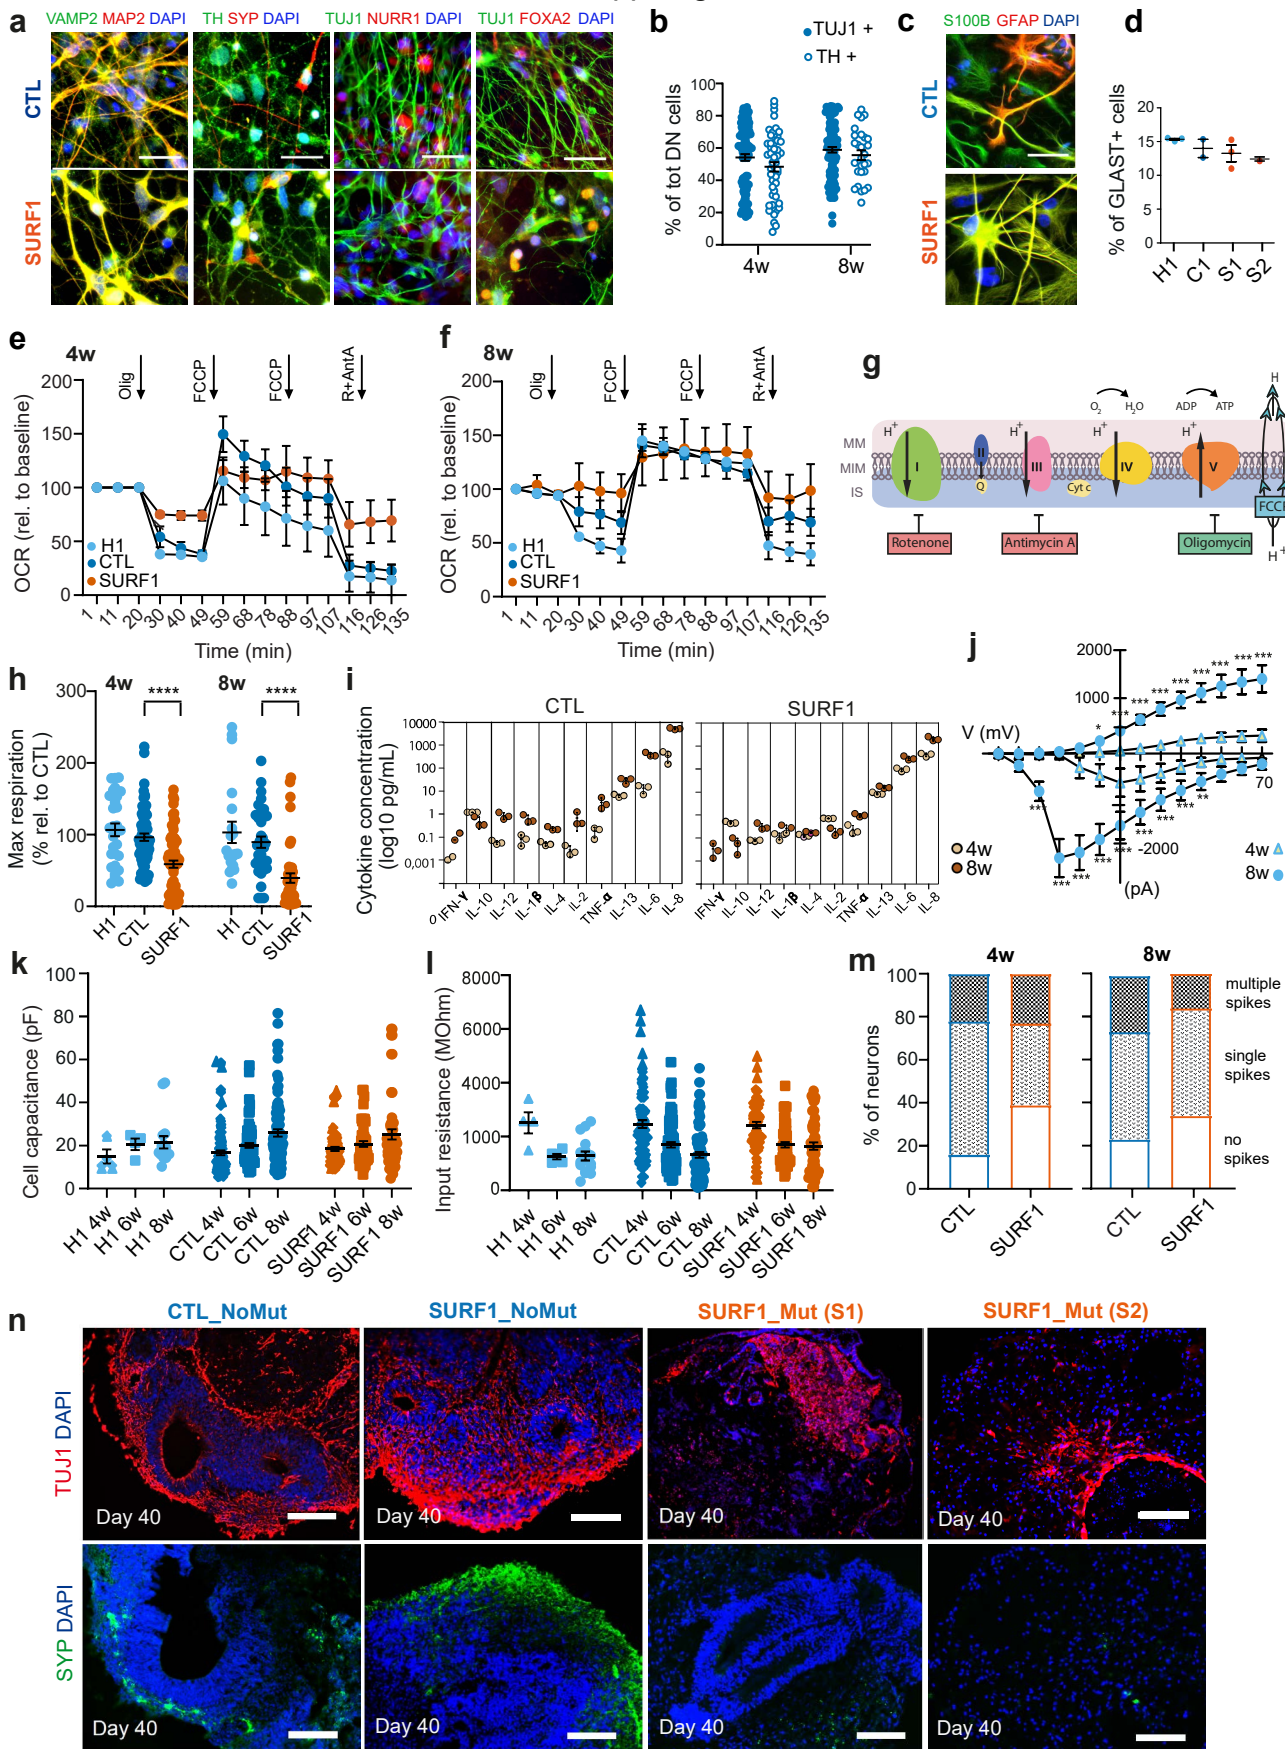



**Supplementary Fig. 3: Characterization of 2D and 3D neuronal models of *SURF1* mutations (related to Fig. 2).**

**a** 8w DNs from CTL (CTL\_NoMut: C2) and SURF1 (SURF1\_Mut: S2) (n=3 independent experiments). Scale bar: 50  $\mu$ m. **b** Percentage of TUJ1+ (empty box) and TH+ neurons (dotted box) in 4w DNs and 8w DNs from CTL (CTL\_NoMut: C1, C2, C3; SURF1\_NoMut: S2\_Corr1, S2\_Corr2) (mean +/- s.e.m.; n=15 biological replicates (dots) per line over 3 independent experiments). **c** Glial cells in 8w DNs from CTL (CTL\_NoMut: C1) and SURF1 (SURF1\_Mut: S2) (n=3 independent experiments). Scale bar: 50  $\mu$ m. **d** MACS-based quantification of astrocyte marker GLAST in 8w DNs from hESCs (H1), CTL (CTL\_NoMut: C1), and SURF1 (SURF1\_Mut: S1, S2) (mean +/- s.e.m.; n=3 independent experiments). **e-f** OCR of 4w DNs and 8w DNs from hESCs (H1), CTL (CTL\_NoMut: C1, C2, C3; SURF1\_NoMut: S2\_Corr1), and SURF1 (SURF1\_Mut: S1, S2; CTL\_Mut: C1\_Mut1) (mean +/- s.e.m.; n=3 independent experiments). **g** Mode of action of the mitochondrial inhibitors during bioenergetic profiling. **h** Maximum respiration rate of 4w DNs and 8w DNs from hESCs (H1), CTL (CTL\_NoMut: C1, C2, C3; SURF1\_NoMut: S2\_Corr1) and SURF1 (SURF1\_Mut: S1, S2; CTL\_Mut: C1\_Mut1) (mean +/- s.e.m.; n=15 biological replicates (dots) per line over 3 independent experiments; \*\*\*\*p<0.0001 CTL vs. SURF1; Two-sided Mann-Whitney U test). **i** Extracellular cytokines in 4w DNs (light brown) and 8w DNs (dark brown) from CTL (CTL\_NoMut: C1) and SURF1 (SURF1\_Mut: S2). Reproduced in hESCs (H1), CTL (CTL\_NoMut: C2, C3), and SURF1 (SURF1\_Mut: S1) (mean +/- s.e.m.; n=3 independent experiments). **j** Sodium and potassium currents in 4w DNs and 8w DNs from hESCs (H1) (mean +/- s.d.; n=40 cells per line over 2 independent experiments; \*p<0.05, \*\*p<0.01, \*\*\*p<0.001 8w vs. 4w; Two-sided Mann-Whitney U test). **k-l** Cell capacitance (pF) and input resistance (MOhm) in 4w DNs, 6w DNs, and 8w DNs from hESCs (H1), CTL (CTL\_NoMut: C1, C2, C3; SURF1\_NoMut: S2\_Corr1), and SURF1 (SURF1\_Mut: S1, S2) (mean +/- s.e.m.; n=6 cells per line per condition over 2 independent experiments). **m** Percentage of firing neurons (mean) in 4w DNs and 8w DNs from CTL (CTL\_NoMut: C1, C2, C3; SURF1\_NoMut: S2\_Corr1), and SURF1 (SURF1\_NoMut: S1, S2) (mean +/- s.e.m.; n=40 cells per line over 2 independent experiments). **n** D40 cerebral organoids from CTL (CTL\_NoMut: C1; SURF1\_NoMut: S2\_Corr1) and SURF1 (SURF1\_Mut: S1, S2). Reproduced in CTL (CTL\_NoMut: C2) and SURF1 (CTL\_Mut: C1\_Mut1) (3-8 organoids per line per experiment, n=3 independent experiments). Scale bar: 100  $\mu$ m.

Supp. Figure 4

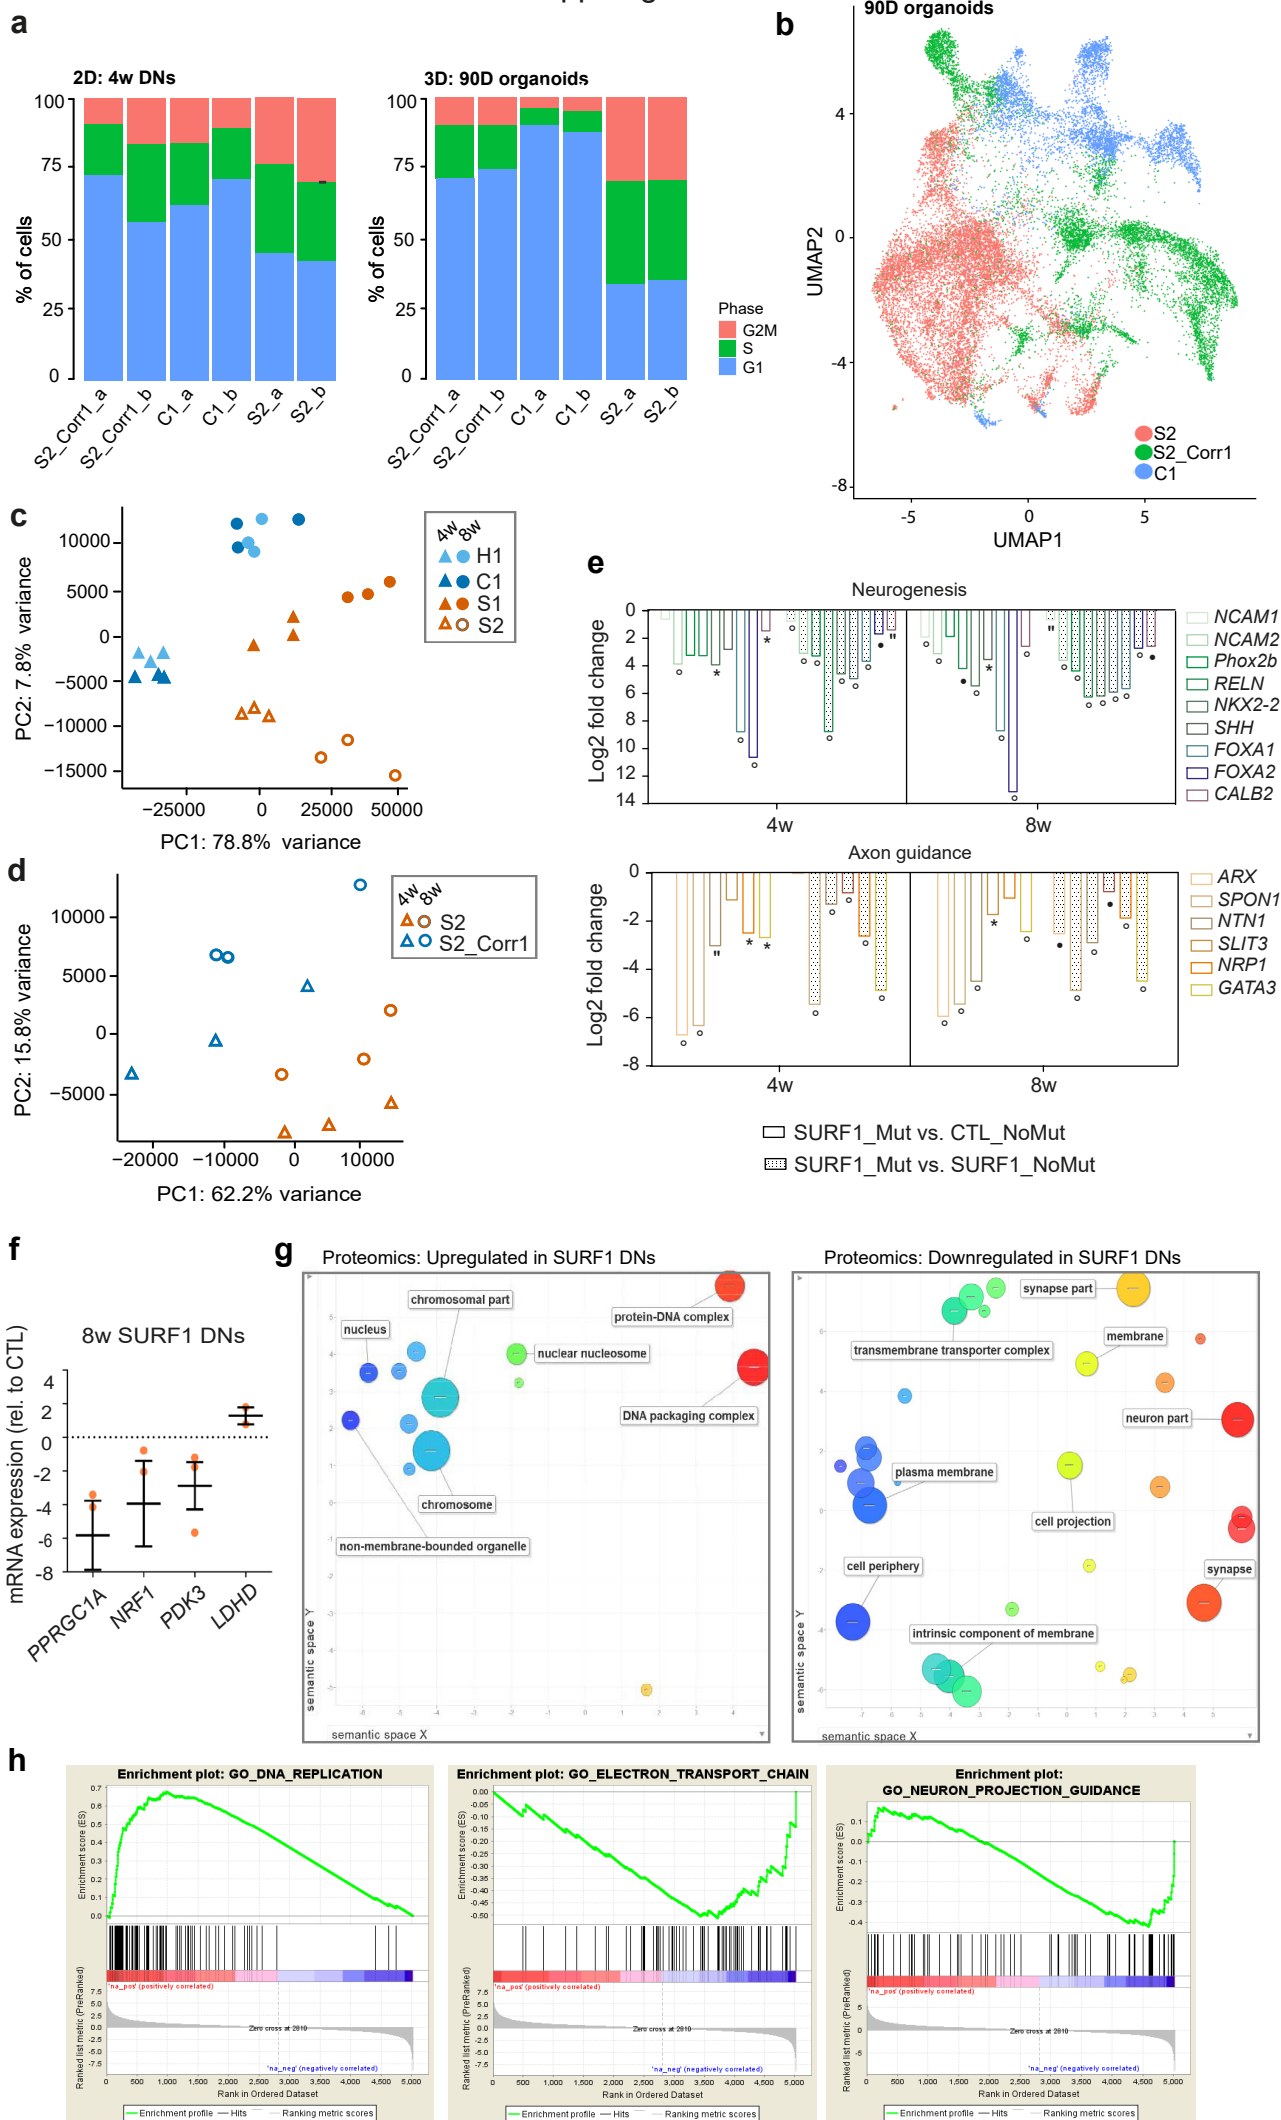



**Supplementary Fig. 4: Single-cell transcriptomics and multi-omics integration of SURF1 neuronal cultures (related to Fig. 3 and Fig. 4).**

**a** Cell cycle distribution in 4w DNs from CTL (CTL\_NoMut: C1; SURF1\_NoMut: S2\_Corr1) and SURF1 (SURF1\_Mut: S2), and D90 brain organoids from CTL (CTL\_NoMut: C1; SURF1\_NoMut: S2\_Corr1) and SURF1 (SURF1\_Mut: S2) (3-8 organoids per line per experiment; n=2 independent experiments indicated with “a” and “b”). **b** UMAP plot depicting the distribution of D90 organoids from CTL (CTL\_NoMut: C1; SURF1\_NoMut: S2\_Corr1) and SURF1 (SURF1\_Mut: S2) (3-8 organoids per line per experiment; n=2 independent experiments). **c** Principal component (PC) analysis of 4w DNs and 8w DNs from hESCs (H1), CTL (CTL\_NoMut: C1), and SURF1 (SURF1\_Mut: S1, S2) based on mRNA-sequencing (n=3 independent experiments) (see Supplementary Data 10). **d** PC analysis of 4w DNs and 8w DNs from CTL (SURF1\_NoMut: S2\_Corr1) and SURF1 (SURF1\_Mut: S2) based on total RNA-sequencing (n=3 independent experiments) (see Supplementary Data 5 for 8w DNs and Supplementary Data 9 for 4w DNs). **e** Differentially regulated genes associated with neurogenesis and axon guidance based on RNA-seq analysis in 4w DNs and 8w DNs from SURF1\_Mut (S1, S2) compared to CTL\_NoMut (C1) (see Supplementary Data 10) and in 4w and 8w DNs from SURF1\_Mut (S2) compared to SURF1\_NoMut (S2\_Corr1) (see Supplementary Data 5) (n=3 independent experiments; \*p<0.05, \*\*p<0.01, \*\*\*p<0.001, \*\*\*\*p<0.0001 CTL vs. SURF1; Two-tailed Wald test with Benjamini-Hochberg correction for multiple comparisons; FDR<0.05). **f** QRT-PCR of genes regulating mitochondrial bioenergetics (*PPRGC1A*, *NRF1*, and *PDK3*) and glycolysis (*LDHD*) in 8w DNs from CTL (SURF1\_NoMut: S2\_Corr1) and SURF1 (SURF1\_Mut: S2) (normalized to *ACTB*; mean +/- s.d; n=3 independent experiments). **g** Rovigo representation of proteomics of 8w DNs from CTL (SURF1\_NoMut: S2\_Corr1) and SURF1 (SURF1\_Mut: S2) based on GO terms related to “cell compartment”. Left: upregulated cell compartment in SURF1 vs. CTL; right: downregulated cell compartment in SURF1 vs. CTL (n=3 independent experiments). **h** Gene set enrichment analysis (GSEA) of proteomics dataset. Examples of pathways upregulated (left) and downregulated (middle and right) in 8w DNs from SURF1 (SURF1\_Mut: S2) compared to CTL (SURF1\_NoMut: S2\_Corr1) (n=3 independent experiments).

# Supp. Figure 5

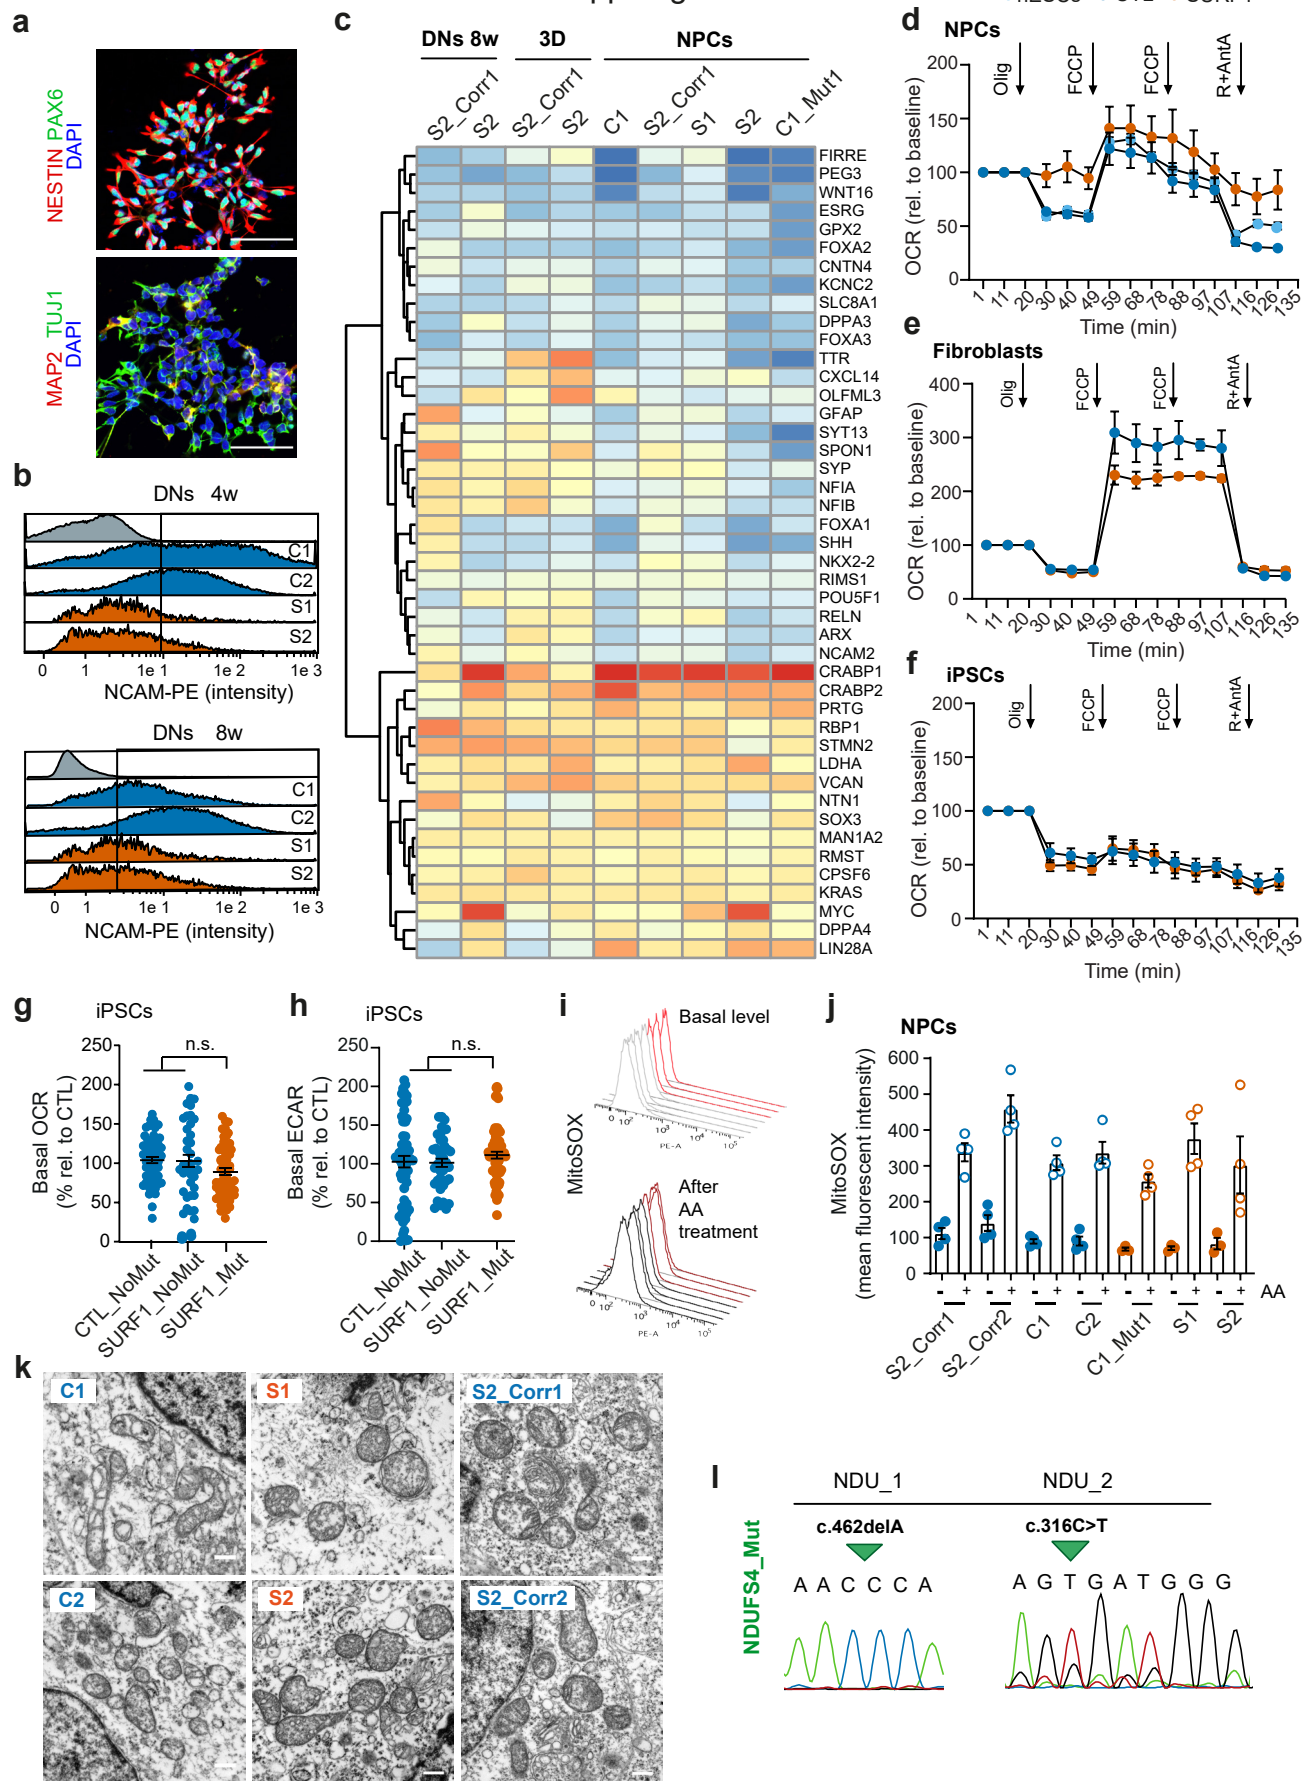

**Supplementary Fig. 5: Phenotypic characterization of SURF1 NPCs (related to Fig. 5).**

**a** SURF1 NPCs (SURF1\_Mut: S2) showing NPC markers (NESTIN, PAX6), and neuronal markers (TUJ1, MAP2) (n=3 independent experiments). Scale bar: 50  $\mu$ m. **b** MACS-sorted NCAM+ cells in 4w DNs and 8w DNs from CTL (CTL\_NoMut: C1, C2) and SURF1 (SURF1\_Mut: S1, S2). Grey: NCAM negative sorted cells; x-axis: fluorescence intensity; y-axis: cell number (n=3 independent experiments). **c** Heatmap of Nanostring expression analysis of 8w DNs from CTL (SURF1\_NoMut: S2\_Corr1) and SURF1 (SURF1\_Mut: S2), 90D brain organoids from CTL (SURF1\_NoMut: S2\_Corr1) and SURF1 (SURF1\_Mut: S2), and NPCs from CTL (CTL\_NoMut: C1; SURF1\_NoMut: S2\_Corr1) and SURF1 (SURF1\_Mut: S1, S2; CTL\_Mut: C1\_Mut1) (3-8 organoids per line per experiment; n=3 independent experiments). Blue: low expression level; red: high expression level. **d** OCR of NPCs from hESCs (H1), CTL (CTL\_NoMut: C1, C2, C3; SURF1\_NoMut: S2\_Corr1), and SURF1 (SURF1\_Mut: S1, S2; CTL\_Mut: C1\_Mut1) (mean  $\pm$  s.e.m.; n=25 biological replicates per line over 3 independent experiments). **e** OCR of fibroblasts from CTL (CTL\_NoMut: C2, C3) and SURF1 (SURF1\_Mut: S1, S2) (mean  $\pm$  s.e.m.; n=25 biological replicates per line over 2 independent experiments). **f** OCR of iPSCs from CTL (SURF1\_NoMut: S2\_Corr1, S2\_Corr2) and SURF1 (SURF1\_Mut: S2) (mean  $\pm$  s.e.m.; n=25 biological replicates per line over 2 independent experiments). **g-h** OCR and ECAR of iPSCs from CTL (CTL\_NoMut: C1; SURF1\_NoMut: S2\_Corr1, S2\_Corr2) and SURF1 (SURF1\_Mut: S2) (mean  $\pm$  s.e.m.; n=25 biological replicates (dots) per line over 2 independent experiments; n.s.=not significant CTL vs. SURF1; Two-sided Mann-Whitney U test). **i-j** FACS-based prolife (left) and quantification (right) of mean fluorescence intensity of mitochondrial ROS detector MitoSOX in NPCs from CTL (CTL\_NoMut: C1, C2; SURF1\_NoMut: S2\_Corr1, S2\_Corr2) and SURF1 (SURF1\_Mut: S1, S2; CTL\_Mut: C1\_Mut1). We performed the experiments at the basal level and after 1h treatment with 3  $\mu$ M antimycin A (AA) to stimulate ROS (mean  $\pm$  s.d.; n=4 independent experiments). **k** Mitochondrial morphology by electron microscopy in NPCs from CTL (CTL\_NoMut: C1, C2; SURF1\_NoMut: S2\_Corr1, S2\_Corr2) and SURF1 (SURF1\_Mut: S1, S2) (n=2 independent experiments). Scale bar: 500 nm. **l** Electropherograms of iPSCs NDUFS4\_Mut (NDU\_1, NDU\_2) derived from two LS patients carrying mutations in CI gene *NDUFS4*.

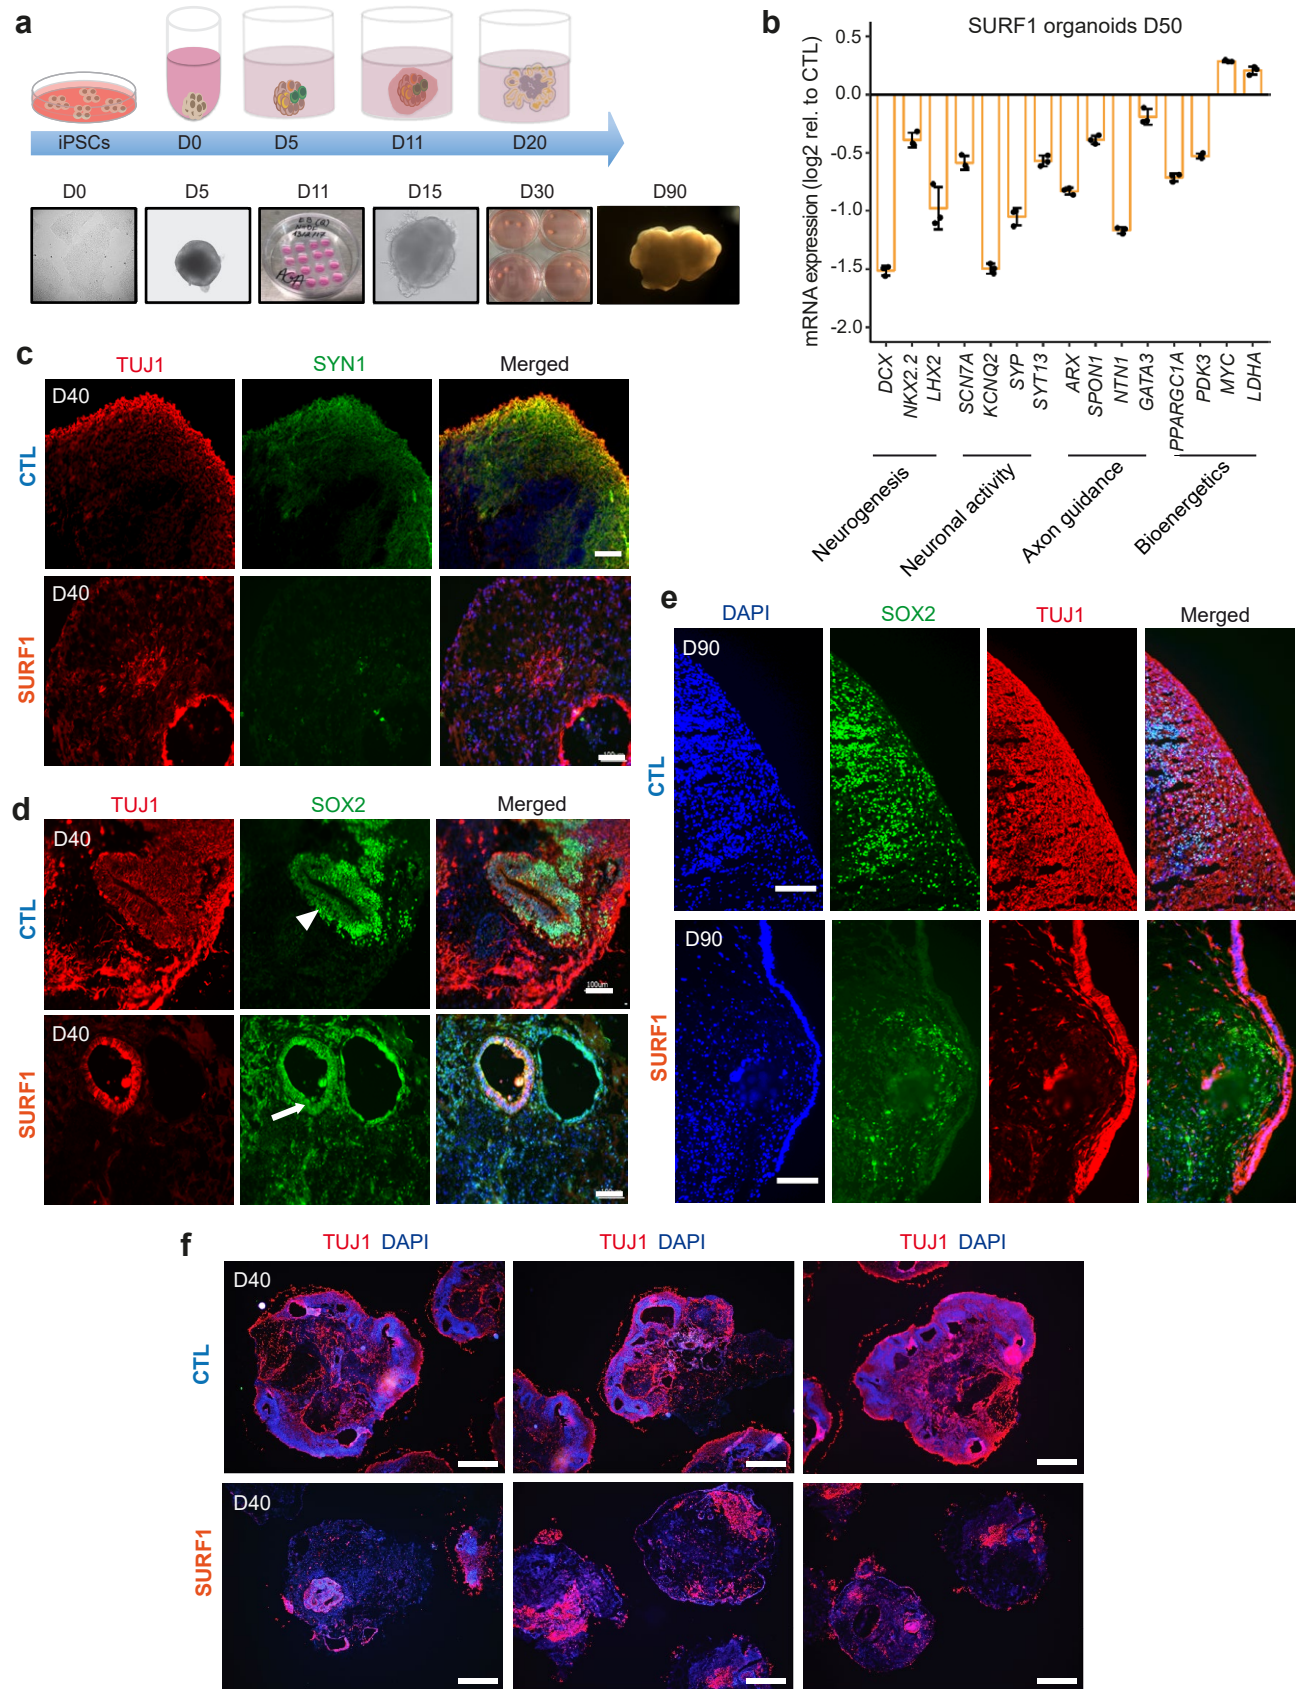

**Supplementary Fig. 6: Cytoarchitecture and neural progenitor organization in SURF1 brain organoids (related to Fig. 6).**

**a** Cerebral organoid maturation from the day of embedding into Matrigel (day 0). Scale bars: D0=500  $\mu\text{m}$ , D10=200  $\mu\text{m}$ , D40=200  $\mu\text{m}$ . **b** QRT-PCR-based expression of genes associated with neurogenesis, neuronal activity, axon guidance, and bioenergetics in D50 cerebral organoids from CTL (SURF1\_NoMut: S2\_Corr1) and SURF1 (SURF1\_Mut: S2) (normalized over *GAPDH* expression; mean  $\pm$  s.d.; 3-8 organoids per line per experiment; n=3 independent experiments). **c** Representative immunofluorescence images of D40 cerebral organoids from CTL (SURF1\_NoMut: S2\_Corr1) and SURF1 (SURF1\_Mut: S2) for neuronal marker TUJ1 and synaptic marker SYN1 (3-8 organoids per line per experiment; n=3 independent experiments Scale bar: 100  $\mu\text{m}$ ). **d** D40 cerebral organoids from CTL (SURF1\_NoMut: S2\_Corr1) and SURF1 (SURF1\_Mut: S2). White arrowhead: SOX2+ neuroepithelial layering; white arrow: thinning and disruption of SOX2+ neuroepithelial layering. Reproduced in CTL (CTL\_NoMut: C2; SURF1\_NoMut; S2\_Corr1) and SURF1 (SURF1\_Mut: S2) (3-8 organoids per line per experiment; n=2 independent experiments Scale bar: 100  $\mu\text{m}$ ). **e** D90 cerebral organoids from CTL (SURF1\_NoMut: S2\_Corr1) and SURF1 (SURF1\_Mut: S1) for progenitor marker SOX2 and neuronal marker TUJ1 (3-8 organoids per line per experiment; n=2 independent experiments) Scale bar: 100  $\mu\text{m}$ . **f** D40 organoids from CTL (CTL\_NoMut: C1) and SURF1 (SURF1\_Mut: S2) showing the differences in size across replicates. Reproduced in CTL (CTL\_NoMut: C2) and SURF1 (SURF1\_Mut: S1; CTL\_Mut: C1\_Mut1) (3-8 organoids per line per experiment, n=3 independent experiments). Scale bar: 500  $\mu\text{m}$ .

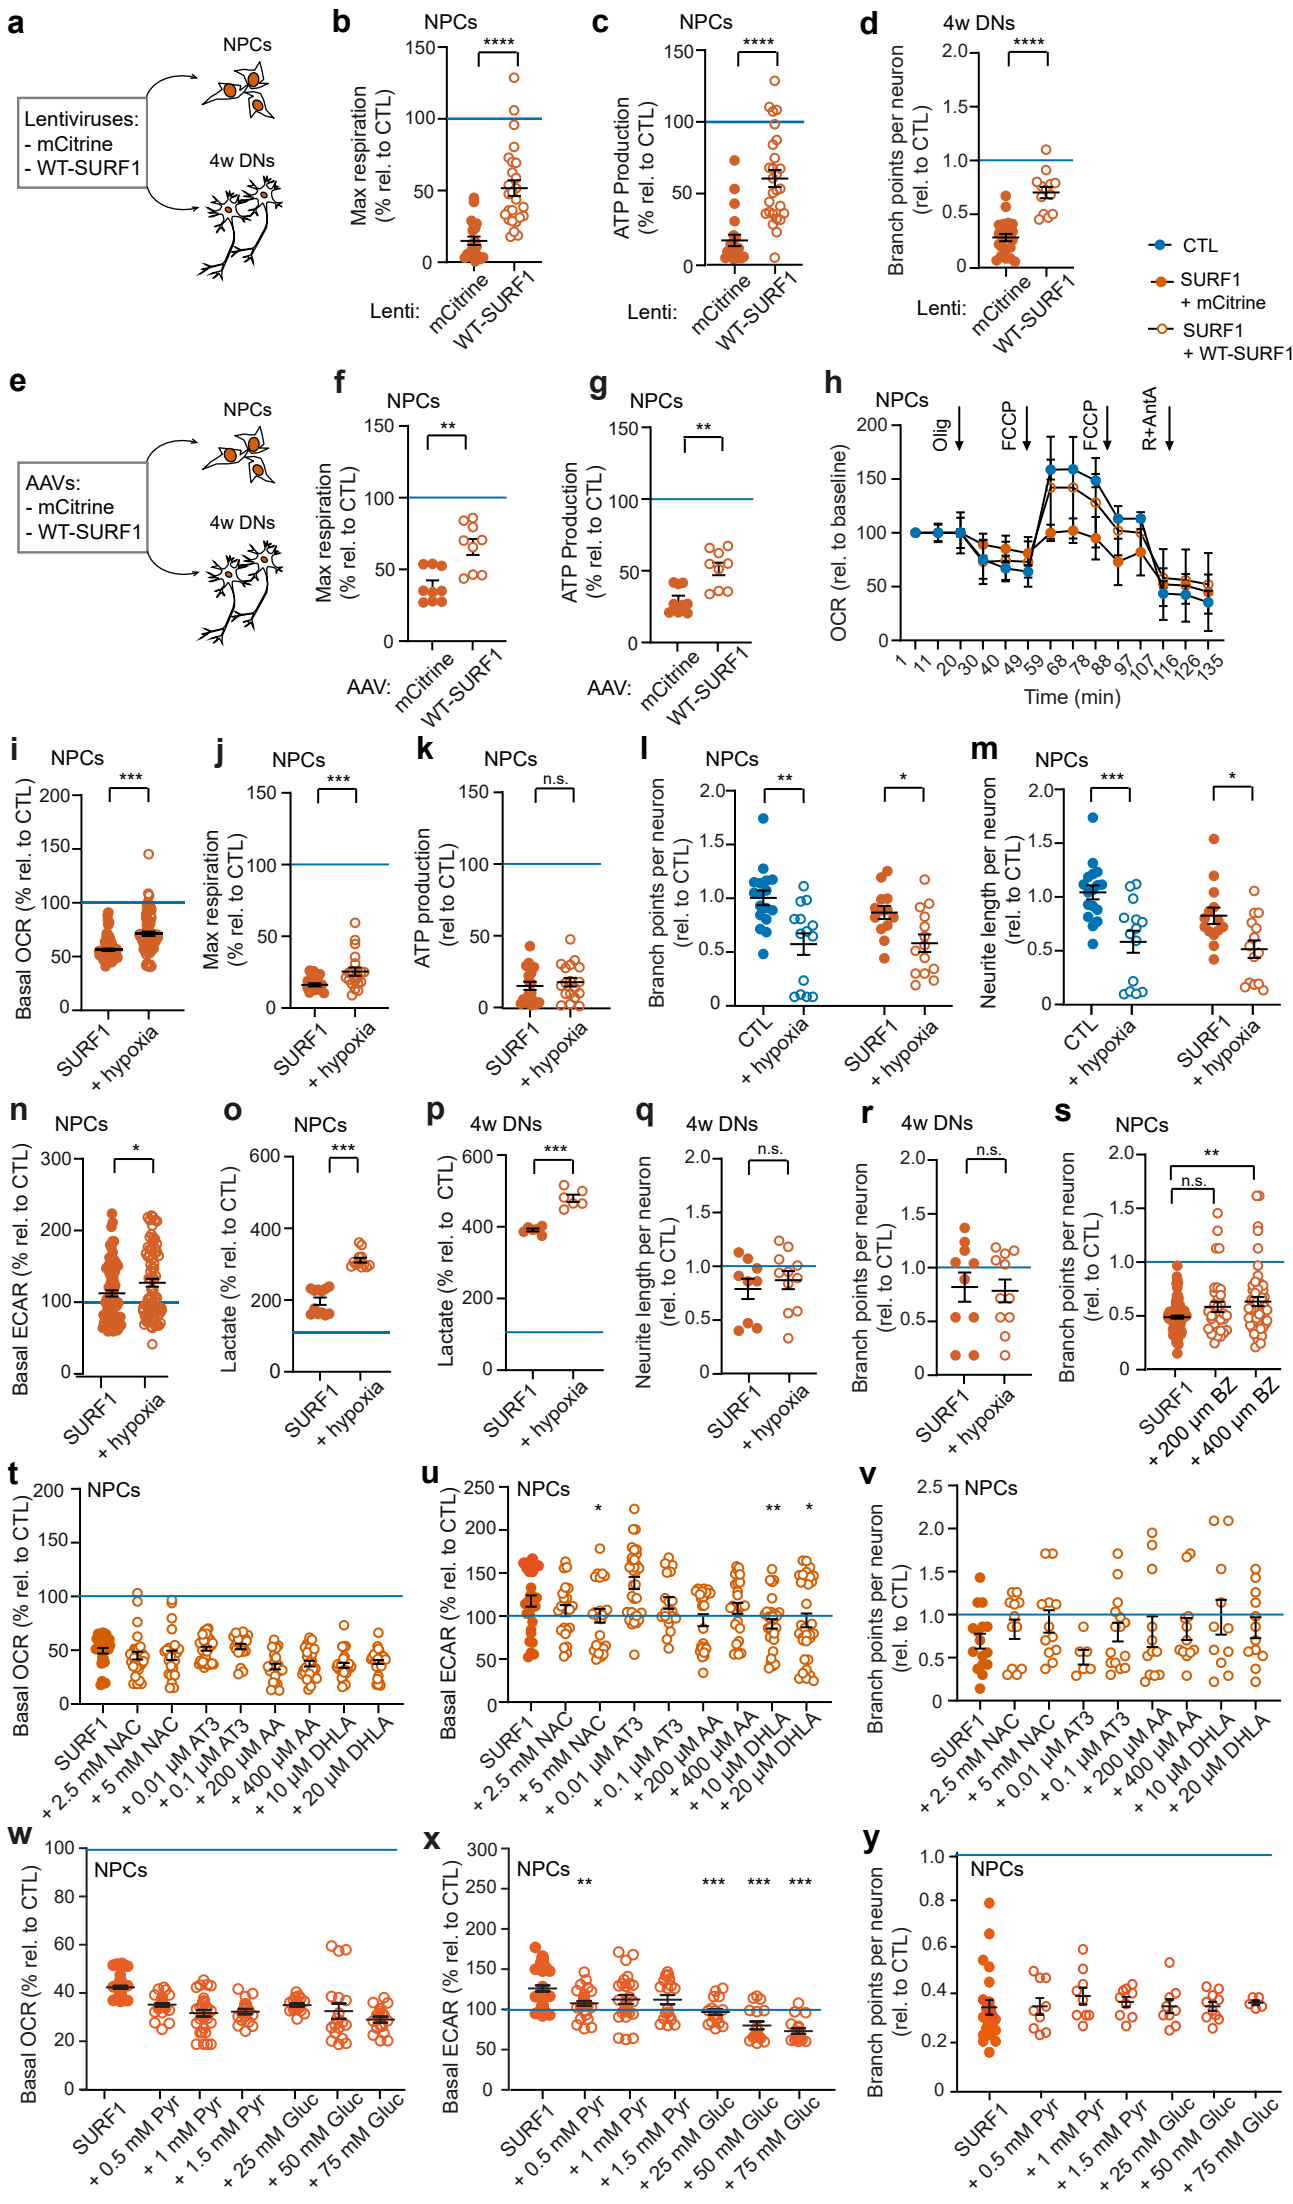



**Supplementary Fig. 7: Treatment strategies in SURF1 neural cells (related to Fig. 7).**

**a** Scheme of lentiviral delivery. **b-c** Bioenergetics in SURF1 NPCs (SURF1\_Mut: S1, S2) after lentiviral delivery (mean +/- s.e.m.; n=10 biological replicates (dots) per line over 2 independent experiments; \*\*\*\*p<0.0001; Two-sided Mann-Whitney U test). **d** Morphogenesis in 4w DNs from SURF1 (SURF1\_Mut: S1, S2) after lentiviral delivery (mean +/- s.e.m.; n=10 biological replicates (dots) per line over 2 independent experiments; \*\*\*\*p<0.0001; Two-sided Mann-Whitney U test). **e** Scheme of AAV delivery. **f-g** Bioenergetics in SURF1 NPCs (SURF1\_Mut: S1, S2) after AAV delivery (mean +/- s.e.m.; n=4 biological replicates (dots) per line over 2 independent experiments; \*\*p<0.001; Two-sided Mann-Whitney U test). **h** OCR in CTL NPCs (CTL\_NoMut: C1; SURF1\_NoMut: S2\_Corr1) and SURF1 NPCs (SURF1\_Mut: S1, S2) after AAV delivery (mean +/- s.e.m.; n=15 biological replicates per line over 2 independent experiments). **i-k** Bioenergetics of SURF1 NPCs (SURF1\_Mut: S1, S2) under normoxia or hypoxia (mean +/- s.e.m.; n=6 biological replicates (dots) per line over 3 independent experiments; n.s.=not significant, \*\*\*p<0.001; Two-sided Mann-Whitney U test). **l-m** Morphogenesis in NPCs from CTL (CTL\_NoMut: C1; SURF1\_NoMut: S2\_Corr1) and SURF1 (SURF1\_Mut: S1, S2) under normoxia or hypoxia (mean +/- s.e.m.; n=7 biological replicates (dots) per line over 2 independent experiments; \*p<0.05, \*\*p=0.0016, \*\*\*\*p<0.0001; Two-sided Mann-Whitney U test). **n-o** OCR and lactate release in SURF1 NPCs (SURF1\_Mut: S1, S2) under normoxia or hypoxia (mean +/- s.e.m.; n=5 biological replicates (dots) per line over 2 independent experiments; \*p=0.0416, \*\*\*p<0.001; Two-sided Mann-Whitney U test). **p-r** Lactate release and morphogenesis in 4w SURF1 DNs (SURF1\_Mut: S1, S2) under normoxia or hypoxia (mean +/- s.e.m.; n=3 biological replicates per line over 3 independent experiments; \*\*\*p<0.001, n.s.=not significant; Two-sided Mann-Whitney U test). **s** Morphogenesis in SURF1 NPCs (SURF1\_Mut: S1, S2; CTL\_Mut: C1\_Mut1) with BZ compared to UT (mean +/- s.e.m.; n=15 biological replicates (dots) per line over 3 independent experiments; n.s.=not significant, \*\*p=0.0029; Two-sided Mann-Whitney U test). **t-y** Bioenergetics and morphogenesis of SURF1 NPCs (SURF1\_Mut: S1, S2) treated with n-acetyl l-cysteine (NAC), a-tocotrienol (AT3), ascorbic acid (AA), dihydrolipoic acid (DHLA), or with pyruvate or glucose addition (mean +/- s.e.m.; n=3 biological replicates (dots) per line over 2 independent experiments; \*p<0.05, \*\*p<0.01, \*\*\*p<0.001; Two-sided Mann-Whitney U test). Horizontal blue lines in all panels: average values CTL (CTL\_NoMut: C1; SURF1\_NoMut: S2\_Corr1).

Supp. Figure 8

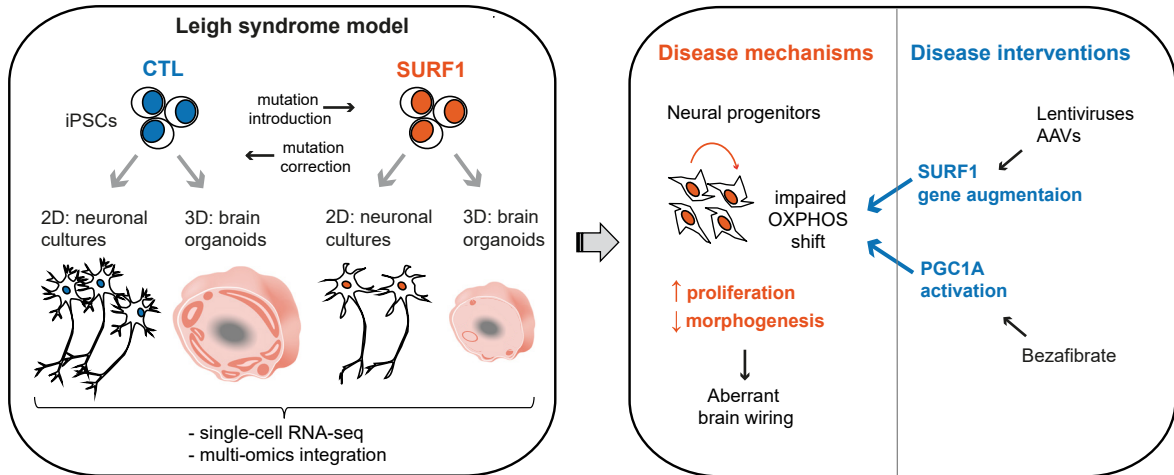

**Supplementary Fig. 8: Schematics summarizing the findings of the current study.**
